# Supplementary material
Source: PubMed Central journal article supplement (PMC9362583)
Supplement: 41596_2022_727_MOESM1_ESM.pdf [file 41596_2022_727_MOESM1_ESM.pdf]

## Supplementary information

---

# High-throughput proteomic sample preparation using pressure cycling technology

---

In the format provided by the authors and unedited

## Supplementary Information

### High-throughput proteomic sample preparation using pressure cycling technology

Xue Cai<sup>1,2</sup>, Zhangzhi Xue<sup>1,2</sup>, Chunlong Wu<sup>3</sup>, Rui Sun<sup>1,2</sup>, Liujia Qian<sup>1,2</sup>, Liang Yue<sup>1,2</sup>, Weigang Ge<sup>3</sup>,

Xiao Yi<sup>3</sup>, Wei Liu<sup>3</sup>, Chen Chen<sup>3</sup>, Huanhuan Gao<sup>3</sup>, Jing Yu<sup>3</sup>, Luang Xu<sup>3</sup>, Yi Zhu<sup>1,2\*</sup>, Tiannan

Guo<sup>1,2\*</sup>

1. Westlake Laboratory of Life Sciences and Biomedicine, Key Laboratory of Structural Biology of Zhejiang Province, School of Life Sciences, Westlake University, Hangzhou, Zhejiang, China;

2. Institute of Basic Medical Sciences, Westlake Institute for Advanced Study, Hangzhou, Zhejiang, China;

3. Westlake Omics (Hangzhou) Biotechnology Co., Ltd. No.1, Yunmeng Road, Cloud Town, Xihu District, Hangzhou (310024), Zhejiang, China;

**\*Correspondence:** zhuyi@westlake.edu.cn; guotiannan@westlake.edu.cn

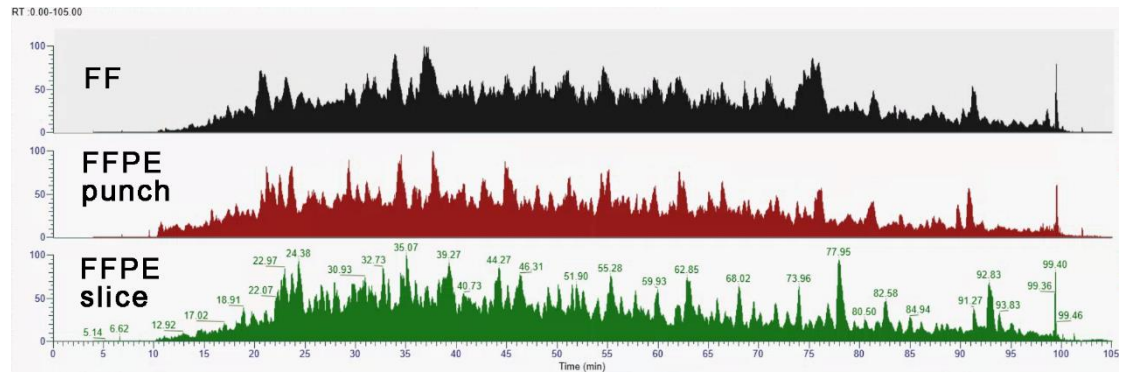

**Supplementary Figure 1 | The extracted ion chromatograms for DDA-MS data of FF, FFPE punches and FFPE slices.** The DDA-MS data are acquired on a nanoflow DIONEX UltiMate 3000 RSLCnano System coupled to a Q Exactive HF hybrid Quadrupole-Orbitrap with an effective LC gradient of 90 min and a total run time of 105 min.

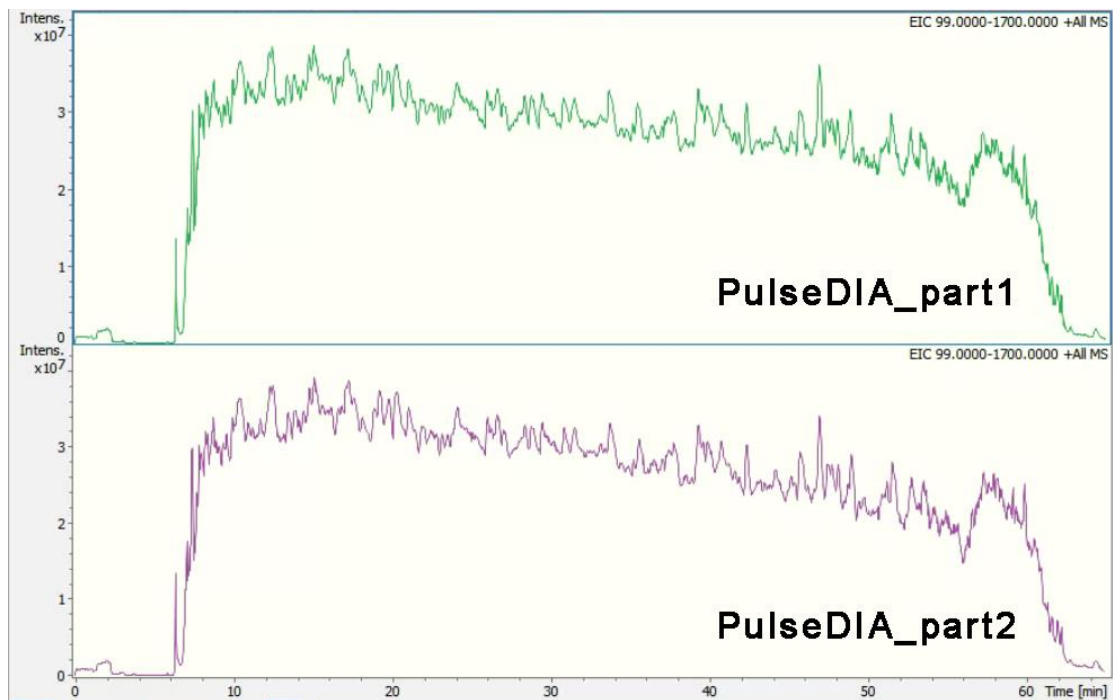

**Supplementary Figure 2 | The extracted ion chromatograms for PulseDIA-PASEF MS data of cancer tissues.** The PulseDIA-PASEF MS data are acquired on a nanoElute System coupled to a timsTOF Pro mass spectrometer with an effective LC gradient of 60 min and a total run time of 65 min.
